# Supplementary material for: Clinical whole genome sequencing as a first-tier test at a resource-limited dysmorphology clinic in Mexico
Source: PubMed Central journal article supplement (PMC6375919; doi:10.1038/s41525-018-0076-1), 2019-02-14
Supplement: 41525_2018_76_MOESM1_ESM.pdf [file 41525_2018_76_MOESM1_ESM.pdf]

5. Did WGS change the management of the patient?

YES

NO

NA

**If no, skip to question 6. If yes, mark all that apply:**

Condition specific management (specific therapy targeted to the diagnosis)

Specify therapy:

Specify therapy:

Specify therapy:

Condition Specific Supportive Interventions (supportive care informed by a better understanding of the diagnosis)

Specify supportive care:

Specify supportive care:

Specify supportive care:

Palliative or End of Life Care (palliative care informed by an improved understanding of the prognosis)

Specify type of palliative care:

Specify type of palliative care:

Specify type of palliative care:

6. Did the WGS result change the post genetic consultation?

YES                      If YES, describe how?

NO

NA

7. The results of the WGS led to additional clinical testing (check all that apply)

Specialty consultation      Specify:

Physiological testing      Specify:

Imaging                      Specify:

Laboratory                  Specify:

None

NA

8. Please provide any additional detail:
